# Supplementary material for: A round robin approach to the analysis of bisphenol a (BPA) in human blood samples
Source: PubMed Central journal article supplement (PMC4066311; doi:10.1186/1476-069x-13-25), 2014-04-01
Supplement: 1476-069X-13-25-S3.pdf [file 1476-069X-13-25-S3.pdf]

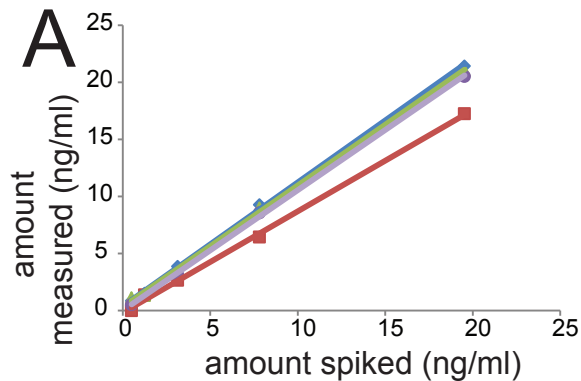

|       | slope | intercept | R square |
|-------|-------|-----------|----------|
| Lab 1 | 1.08  | 0.4       | 0.9991   |
| Lab 2 | 0.89  | -0.17     | 0.9981   |
| Lab 3 | 1.06  | 0.33      | 0.9988   |
| Lab 4 | 1.05  | 0.02      | 0.9995   |

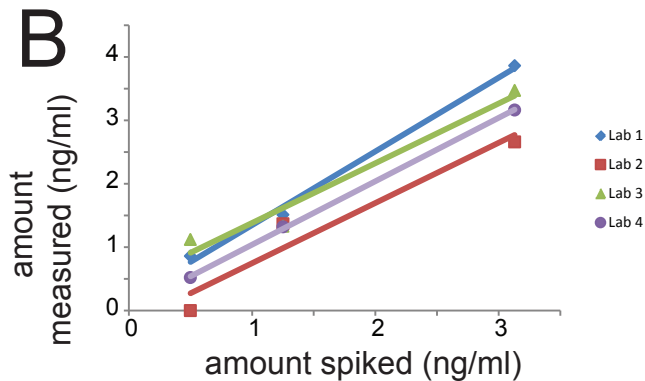

|       | slope | intercept | R square |
|-------|-------|-----------|----------|
| Lab 1 | 1.16  | 0.19      | 0.9947   |
| Lab 2 | 0.95  | -0.2      | 0.9337   |
| Lab 3 | 0.94  | 0.44      | 0.9607   |
| Lab 4 | 1     | 0.04      | 0.9996   |

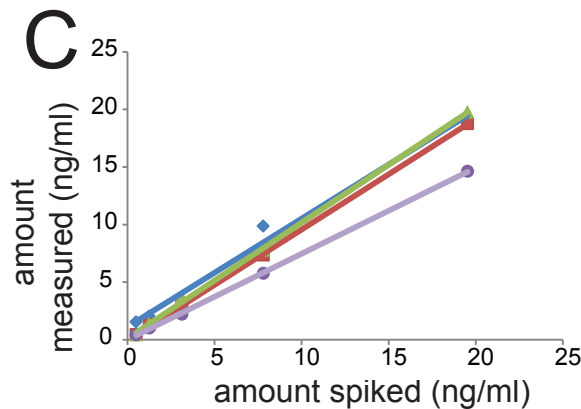

|       | slope | intercept | R square |
|-------|-------|-----------|----------|
| Lab 1 | 0.94  | 1.12      | 0.9877   |
| Lab 2 | 0.96  | -0.04     | 0.9998   |
| Lab 3 | 1     | 0.12      | 0.999    |
| Lab 4 | 0.75  | -0.01     | 0.9998   |

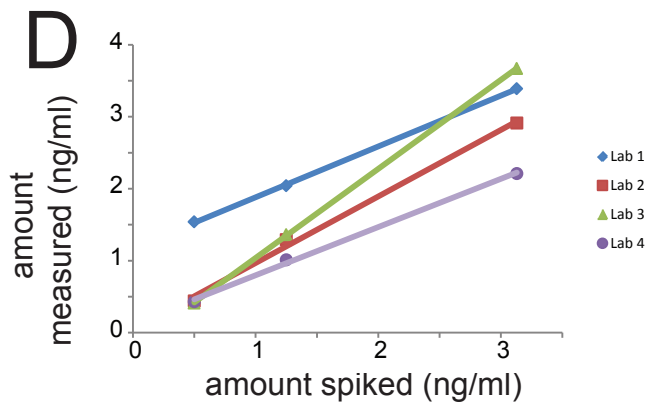

|       | slope | intercept | R square |
|-------|-------|-----------|----------|
| Lab 1 | 0.71  | 1.17      | 0.9997   |
| Lab 2 | 0.92  | 0.04      | 0.9958   |
| Lab 3 | 1.24  | -0.2      | 1        |
| Lab 4 | 0.67  | 0.13      | 0.998    |
