# Supplementary material for: A round robin approach to the analysis of bisphenol a (BPA) in human blood samples
Source: PubMed Central journal article supplement (PMC4066311; doi:10.1186/1476-069x-13-25), 2014-04-01
Supplement: 1476-069X-13-25-S5.pdf [file 1476-069X-13-25-S5.pdf]

# A

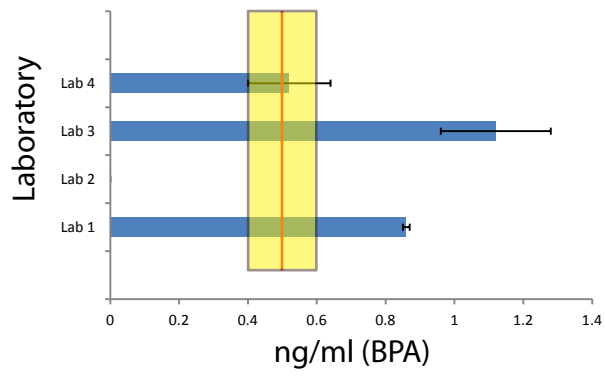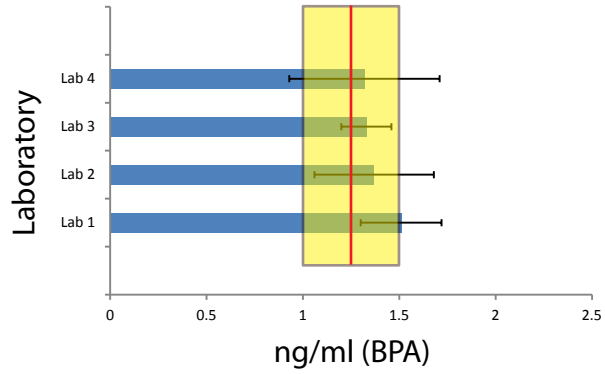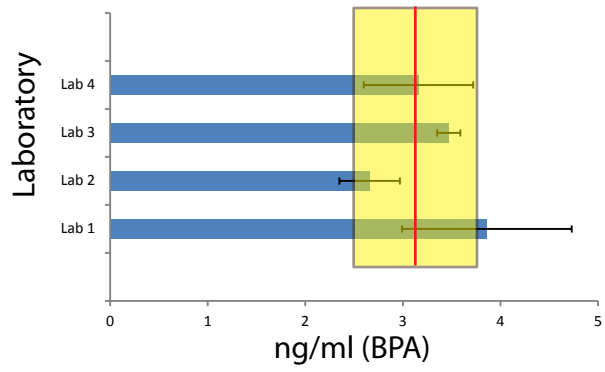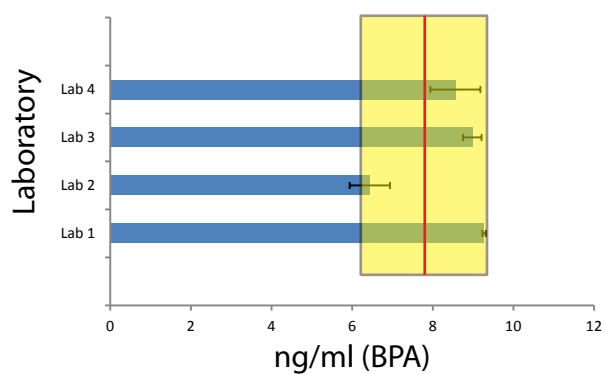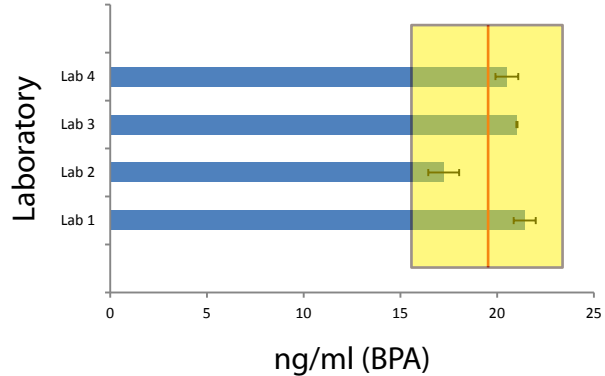

| spiked: | 0.5  | 1.25 | 3.13 | 7.81 | 19.53 | result   |
|---------|------|------|------|------|-------|----------|
| Lab 1   | no   | no   | no   | PASS | PASS  |          |
| Lab 2   | no   | PASS | PASS | PASS | PASS  | VERIFIED |
| Lab 3   | no   | PASS | PASS | PASS | PASS  | VERIFIED |
| Lab 4   | PASS | PASS | PASS | PASS | PASS  | VERIFIED |

# B

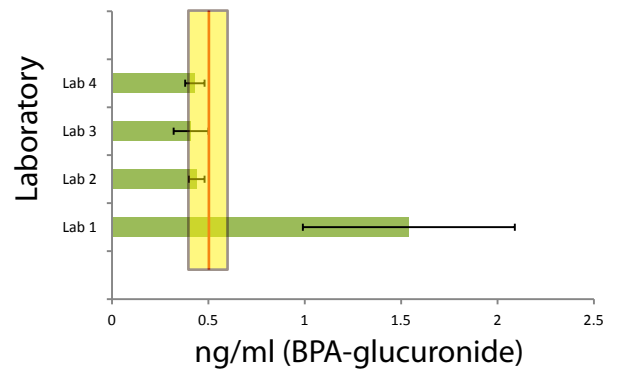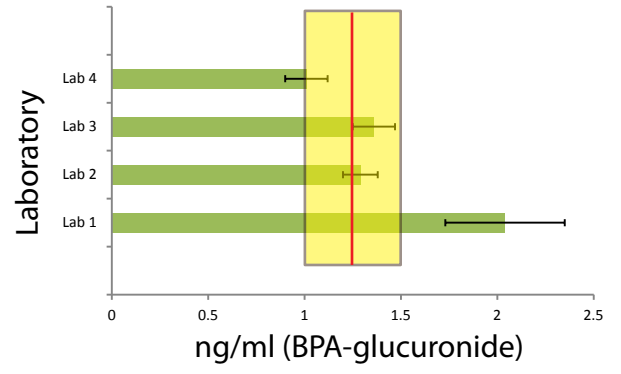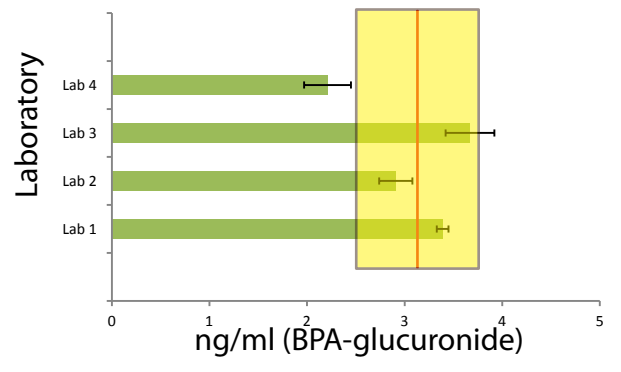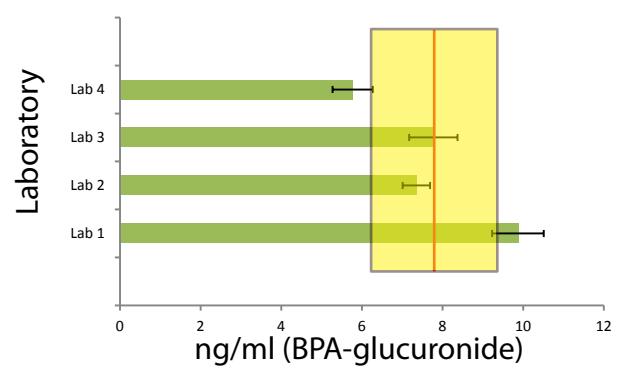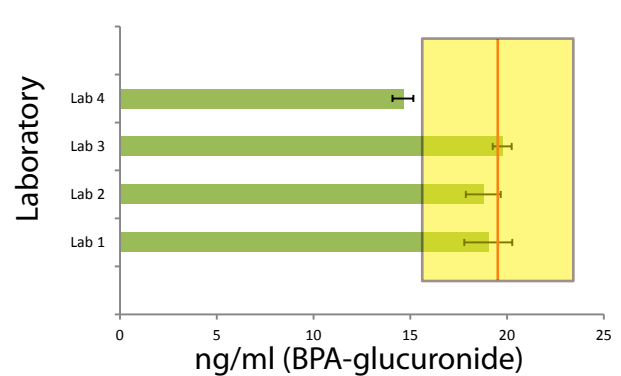

| spiked: | 0.5  | 1.25 | 3.13 | 7.81 | 19.53 | result   |
|---------|------|------|------|------|-------|----------|
| Lab 1   | no   | no   | PASS | no   | PASS  |          |
| Lab 2   | PASS | PASS | PASS | PASS | PASS  | VERIFIED |
| Lab 3   | PASS | PASS | PASS | PASS | PASS  | VERIFIED |
| Lab 4   | PASS | PASS | no   | no   | no    |          |
