# Supplementary material for: A round robin approach to the analysis of bisphenol a (BPA) in human blood samples
Source: PubMed Central journal article supplement (PMC4066311; doi:10.1186/1476-069x-13-25), 2014-04-01

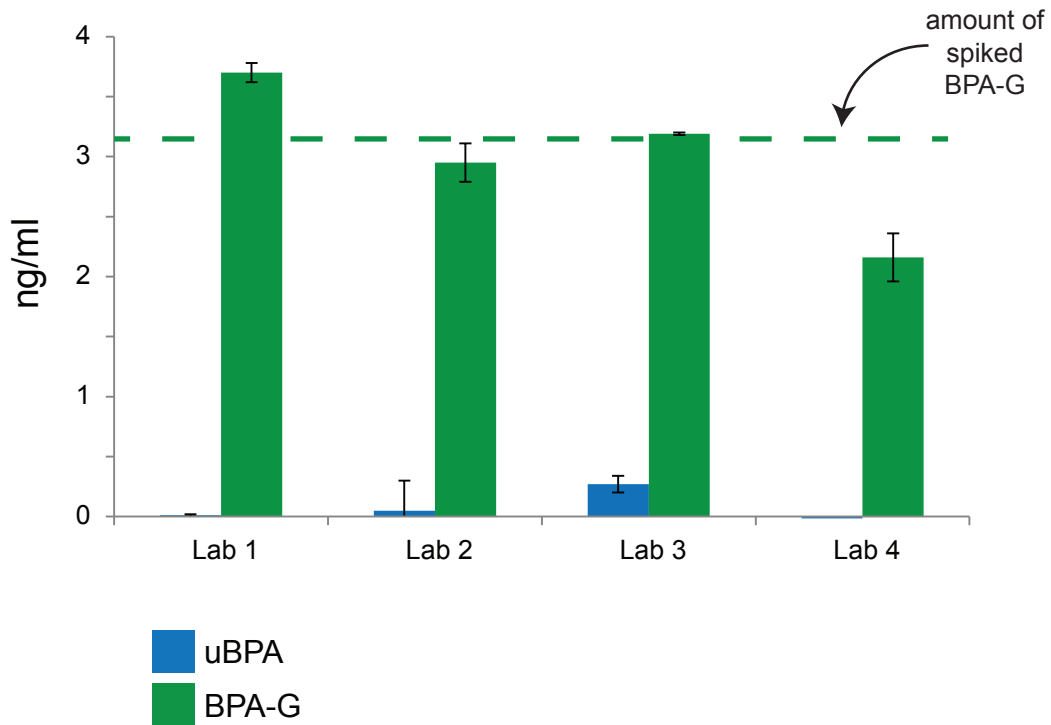

Supplement: 1476-069X-13-25-S6.pdf [file 1476-069X-13-25-S6.pdf]
